# Supplementary material for: Evaluation of NAG, NGAL, and KIM-1 as Prognostic Markers of the Initial Evolution of Kidney Transplantation
Source: MDPI journal article supplement (doi:10.3390/diagnostics13111843), 2023-05-25
Supplement: s1 [file s1]

## Supplementary material

**Table S1: Relationship between NAG on day 3 after transplant (NAG D3) and each transplant group:** cadaveric donor under 55 years old (Cadaveric < 55), cadaveric donor over 55 years old (Cadaveric > 55), double kidney-pancreas transplant (Pancreas) and living donor (Living). Contingency table performed by Pearson's  $\chi^2$  test. Missing: missing values. > 70 Perc: patients above the 70th percentile. < 70 Perc: patients below the 70th percentile.

|                    |                    |                           | NAG D3  |         |            |       |
|--------------------|--------------------|---------------------------|---------|---------|------------|-------|
|                    |                    |                           | Missing | >70Perc | <70Perc    | Total |
| Type of transplant | Cadaveric < 55     | Observed frequency        | 0       | 4       | 13         | 17    |
|                    |                    | Expected frequency        | 2,0     | 4,7     | 10,3       | 17,0  |
|                    | Cadaveric > 55     | Observed frequency        | 2       | 11      | 22         | 35    |
|                    |                    | Expected frequency        | 4,1     | 9,6     | 21,3       | 35,0  |
|                    | <b>Pancreas</b>    | <b>Observed frequency</b> | 6       | 2       | <b>1</b>   | 9     |
|                    |                    | <b>Expected frequency</b> | 1,0     | 2,5     | <b>5,5</b> | 9,0   |
|                    | Living             | Observed frequency        | 0       | 2       | 6          | 8     |
|                    |                    | Expected frequency        | ,9      | 2,2     | 4,9        | 8,0   |
| Total              | Observed frequency |                           | 8       | 19      | 42         | 69    |
|                    | Expected frequency |                           | 8,0     | 19,0    | 42,0       | 69,0  |

**Table S2: Relationship between NAG on day 3 after transplant (NAG D3) and cold ischemia time of graft.** Contingency table performed by Pearson's  $\chi^2$  test. Missing: missing values. > 70 Perc: patients above the 70th percentile. < 70 Perc: patients below the 70th percentile.

|                         |                |                           | NAG D3  |         |            |       |
|-------------------------|----------------|---------------------------|---------|---------|------------|-------|
|                         |                |                           | Missing | >70Perc | <70Perc    | Total |
| Cold ischemia (minutes) | <120           | Observed frequency        | 0       | 3       | 8          | 11    |
|                         |                | Expected frequency        | 1,3     | 3,0     | 6,7        | 11,0  |
|                         | <b>120-900</b> | <b>Observed frequency</b> | 6       | 7       | <b>3</b>   | 16    |
|                         |                | <b>Expected frequency</b> | 1,9     | 4,4     | <b>9,7</b> | 16,0  |
|                         | 900-1440       | Observed frequency        | 2       | 9       | 31         | 42    |
|                         |                | Expected frequency        | 4,9     | 11,6    | 25,6       | 42,0  |
|                         | Total          | Observed frequency        | 8       | 19      | 42         | 69    |
|                         |                | Expected frequency        | 8,0     | 19,0    | 42,0       | 69,0  |

**Table S3: Relationship between highest value of NAG in the first week after transplant (NAG W1) and stabilization time of renal function** (based on plasma creatinine).. Contingency table performed by Pearson's  $\chi^2$  test. Missing: missing values. > 70 Perc: patients above the 70th percentile. < 70 Perc: patients below the 70th percentile.

|                           |                    |                    | NAG W1  |         |         |       |
|---------------------------|--------------------|--------------------|---------|---------|---------|-------|
|                           |                    |                    | Missing | >70Perc | <70Perc | Total |
| Stabilization time (days) | 30-60              | Observed frequency | 0       | 15      | 32      | 47    |
|                           |                    | Expected frequency | ,7      | 14,3    | 32,0    | 47,0  |
|                           | 60-90              | Observed frequency | 0       | 4       | 14      | 18    |
|                           |                    | Expected frequency | ,3      | 5,5     | 12,3    | 18,0  |
|                           | 90-120             | Observed frequency | 0       | 2       | 0       | 2     |
|                           |                    | Expected frequency | ,0      | ,6      | 1,4     | 2,0   |
| Total                     | Observed frequency |                    | 1       | 21      | 47      | 69    |
|                           | Expected frequency |                    | 1,0     | 21,0    | 47,0    | 69,0  |

**Table S4: Relationship between NGAL on day 7 after transplant (NGAL D7) and each transplant group:** cadaveric donor under 55 years old (Cadaveric < 55), cadaveric donor over 55 years old (Cadaveric > 55), double kidney-pancreas transplant (Pancreas) and living donor (Living). Contingency table performed by Pearson's  $\chi^2$  test. Missing: missing values. > 70 Perc: patients above the 70th percentile. < 70 Perc: patients below the 70th percentile.

|                    |                          |                    | NGAL D7 |         |         |       |
|--------------------|--------------------------|--------------------|---------|---------|---------|-------|
|                    |                          |                    | Missing | >70Perc | <70Perc | Total |
| Type of transplant | <b>Cadaveric &lt; 55</b> | Observed frequency | 1       | 2       | 14      | 17    |
|                    |                          | Expected frequency | 2,5     | 4,2     | 10,3    | 17,0  |
|                    | <b>Cadaveric &gt; 55</b> | Observed frequency | 3       | 13      | 19      | 35    |
|                    |                          | Expected frequency | 5,1     | 8,6     | 21,3    | 35,0  |
|                    | Pancreas                 | Observed frequency | 3       | 0       | 6       | 9     |
|                    |                          | Expected frequency | 1,3     | 2,2     | 5,5     | 9,0   |
|                    | Living                   | Observed frequency | 3       | 2       | 3       | 8     |
|                    |                          | Expected frequency | 1,2     | 2,0     | 4,9     | 8,0   |
|                    | Total                    |                    | 10      | 17      | 42      | 69    |
|                    |                          |                    | 10,0    | 17,0    | 42,0    | 69,0  |

**Table S5: Relationship between highest value of NGAL in the first week after transplant (NGAL W1) and delayed graft function (DGF).** Contingency table performed by Pearson's  $\chi^2$  test. Missing: missing values. > 70 Perc: patients above the 70th percentile. < 70 Perc: patients below the 70th percentile.

|            |                    |                           | NGAL W1 |         |         |       |
|------------|--------------------|---------------------------|---------|---------|---------|-------|
|            |                    |                           | Missing | >70Perc | <70Perc | Total |
| <b>DGF</b> | <b>NO</b>          | <b>Observed frequency</b> | 1       | 6       | 39      | 46    |
|            |                    | <b>Expected frequency</b> | ,7      | 13,3    | 32,0    | 46,0  |
|            | <b>YES</b>         | <b>Observed frequency</b> | 0       | 14      | 9       | 23    |
|            |                    | <b>Expected frequency</b> | ,3      | 6,7     | 16,0    | 23,0  |
| Total      | Observed frequency |                           | 1       | 20      | 48      | 69    |
|            | Expected frequency |                           | 1,0     | 20,0    | 48,0    | 69,0  |

**Table S6: Relationship between NGAL on day 7 after transplant (NGAL D7) and delayed graft function (DGF).** Contingency table performed by Pearson's  $\chi^2$  test. Missing: missing values. > 70 Perc: patients above the 70th percentile. < 70 Perc: patients below the 70th percentile.

|            |                    |                           | NGAL D7 |         |         |       |
|------------|--------------------|---------------------------|---------|---------|---------|-------|
|            |                    |                           | Missing | >70Perc | <70Perc | Total |
| <b>DGF</b> | <b>NO</b>          | <b>Observed frequency</b> | 7       | 7       | 32      | 46    |
|            |                    | <b>Expected frequency</b> | 4,7     | 12,0    | 29,3    | 46,0  |
|            | <b>YES</b>         | <b>Observed frequency</b> | 0       | 11      | 12      | 23    |
|            |                    | <b>Expected frequency</b> | 2,3     | 6,0     | 14,7    | 23,0  |
| Total      | Observed frequency |                           | 7       | 18      | 44      | 69    |
|            | Expected frequency |                           | 7,0     | 18,0    | 44,0    | 69,0  |

**Table S7: Relationship between highest value of NGAL in the first week after transplant (NGAL W1) and both delayed graft function (DGF) and acute rejection (AR).** Contingency table performed by Pearson's  $\chi^2$  test. Missing: missing values. > 70 Perc: patients above the 70th percentile. < 70 Perc: patients below the 70th percentile.

|               |               |                           | NGAL W1 |             |             |       |
|---------------|---------------|---------------------------|---------|-------------|-------------|-------|
|               |               |                           | Missing | >70Perc     | <70Perc     | Total |
| <b>DGF/AR</b> | <b>NO/NO</b>  | <b>Observed frequency</b> | 1       | <b>6</b>    | <b>37</b>   | 44    |
|               |               | <b>Expected frequency</b> | ,6      | <b>12,8</b> | <b>30,6</b> | 44,0  |
|               | NO/YES        | Observed frequency        | 0       | 0           | 2           | 2     |
|               |               | Expected frequency        | ,0      | ,6          | 1,4         | 2,0   |
|               | <b>YES/NO</b> | <b>Observed frequency</b> | 0       | <b>8</b>    | <b>5</b>    | 13    |
|               |               | <b>Expected frequency</b> | ,2      | <b>3,8</b>  | <b>9,0</b>  | 13,0  |
|               | YES/YES       | Observed frequency        | 0       | 6           | 4           | 10    |
|               |               | Expected frequency        | ,1      | 2,9         | 7,0         | 10,0  |
|               | <b>Total</b>  | Observed frequency        | 1       | 20          | 48          | 69    |
|               |               | Expected frequency        | 1,0     | 20,0        | 48,0        | 69,0  |

**Table S8: Relationship between NGAL on day 7 after transplant (NGAL D7) and both delayed graft function (DGF) and acute rejection (AR).** Contingency table performed by Pearson's  $\chi^2$  test. Missing: missing values. > 70 Perc: patients above the 70th percentile. < 70 Perc: patients below the 70th percentile.

|               |               |                           | NGAL D7 |             |             |       |
|---------------|---------------|---------------------------|---------|-------------|-------------|-------|
|               |               |                           | Missing | >70Perc     | <70Perc     | Total |
| <b>DGF/AR</b> | <b>NO/NO</b>  | <b>Observed frequency</b> | 10      | <b>4</b>    | <b>30</b>   | 44    |
|               |               | <b>Expected frequency</b> | 6,4     | <b>10,8</b> | <b>26,8</b> | 44,0  |
|               | NO/YES        | Observed frequency        | 0       | 0           | 2           | 2     |
|               |               | Expected frequency        | ,3      | ,5          | 1,2         | 2,0   |
|               | <b>YES/NO</b> | <b>Observed frequency</b> | 0       | <b>8</b>    | <b>5</b>    | 13    |
|               |               | <b>Expected frequency</b> | 1,9     | <b>3,2</b>  | <b>7,9</b>  | 13,0  |
|               | YES/YES       | Observed frequency        | 0       | 5           | 5           | 10    |
|               |               | Expected frequency        | 1,4     | 2,5         | 6,1         | 10,0  |
|               | <b>Total</b>  | Observed frequency        | 10      | 17          | 42          | 69    |
|               |               | Expected frequency        | 10,0    | 17,0        | 42,0        | 69,0  |

**Table S9: Relationship between highest value of NGAL in the first week after transplant (NGAL W1) and stabilization time of renal function** (based on plasma creatinine).. Contingency table performed by Pearson's  $\chi^2$  test. Missing: missing values. > 70 Perc: patients above the 70th percentile. < 70 Perc: patients below the 70th percentile.

|                           |                    |                           | NGAL W1 |           |            |       |
|---------------------------|--------------------|---------------------------|---------|-----------|------------|-------|
|                           |                    |                           | Missing | >70Perc   | <70Perc    | Total |
| Stabilization time (days) | 0-30               | Observed frequency        | 1       | 1         | 0          | 2     |
|                           |                    | Expected frequency        | ,0      | ,6        | 1,4        | 2,0   |
|                           | 30-60              | Observed frequency        | 0       | 11        | 36         | 47    |
|                           |                    | Expected frequency        | ,7      | 13,6      | 32,7       | 47,0  |
|                           | 60-90              | Observed frequency        | 0       | 6         | 12         | 18    |
|                           |                    | Expected frequency        | ,3      | 5,2       | 12,5       | 18,0  |
|                           | <b>90-120</b>      | <b>Observed frequency</b> | 0       | <b>2</b>  | <b>0</b>   | 2     |
|                           |                    | <b>Expected frequency</b> | ,0      | <b>,6</b> | <b>1,4</b> | 2,0   |
| Total                     | Observed frequency |                           | 1       | 20        | 48         | 69    |
|                           | Expected frequency |                           | 1,0     | 20,0      | 48,0       | 69,0  |

**Table S10: Relationship between highest value of KIM-1 in the first week after transplant (KIM-1 W1) and each transplant group:** cadaveric donor under 55 years old (Cadaveric < 55), cadaveric donor over 55 years old (Cadaveric > 55), double kidney-pancreas transplant (Pancreas) and living donor (Living). Contingency table performed by Pearson's  $\chi^2$  test. Missing: missing values. > 70 Perc: patients above the 70th percentile. < 70 Perc: patients below the 70th percentile.

|                    |                          |                           | KIM-1 W1  |            |             |       |
|--------------------|--------------------------|---------------------------|-----------|------------|-------------|-------|
|                    |                          |                           | Missing   | >70Perc    | <70Perc     | Total |
| Type of transplant | <b>Cadaveric &lt; 55</b> | <b>Observed frequency</b> | <b>0</b>  | <b>8</b>   | <b>9</b>    | 17    |
|                    |                          | <b>Expected frequency</b> | <b>,2</b> | <b>3,4</b> | <b>13,3</b> | 17,0  |
|                    | Cadaveric > 55           | Observed frequency        | 0         | 5          | 30          | 35    |
|                    |                          | Expected frequency        | ,5        | 7,1        | 27,4        | 35,0  |
|                    | Pancreas                 | Observed frequency        | 1         | 0          | 8           | 9     |
|                    |                          | Expected frequency        | ,1        | 1,8        | 7,0         | 9,0   |
|                    | Living                   | Observed frequency        | 0         | 1          | 7           | 8     |
|                    |                          | Expected frequency        | ,1        | 1,6        | 6,3         | 8,0   |
|                    | Total                    |                           | 1         | 14         | 54          | 69    |
|                    |                          |                           | 1,0       | 14,0       | 54,0        | 69,0  |

**Table S11: Relationship between KIM-1 on day 3 after transplant (KIM-1 D3) and each transplant group:** cadaveric donor under 55 years old (Cadaveric < 55), cadaveric donor over 55 years old (Cadaveric > 55), double kidney-pancreas transplant (Pancreas) and living donor (Living). Contingency table performed by Pearson's  $\chi^2$  test. Missing: missing values. > 70 Perc: patients above the 70th percentile. < 70 Perc: patients below the 70th percentile.

|                    |                          |                           | KIM-1 D3 |            |             |       |
|--------------------|--------------------------|---------------------------|----------|------------|-------------|-------|
|                    |                          |                           | Missing  | >70Perc    | <70Perc     | Total |
| Type of transplant | <b>Cadaveric &lt; 55</b> | <b>Observed frequency</b> | 0        | <b>7</b>   | 10          | 17    |
|                    |                          | <b>Expected frequency</b> | 2,0      | <b>3,7</b> | 11,3        | 17,0  |
|                    | <b>Cadaveric &gt; 55</b> | <b>Observed frequency</b> | 1        | 6          | <b>28</b>   | 35    |
|                    |                          | <b>Expected frequency</b> | 4,1      | 7,6        | <b>23,3</b> | 35,0  |
|                    | Pancreas                 | Observed frequency        | 6        | 0          | 3           | 9     |
|                    |                          | Expected frequency        | 1,0      | 2,0        | 6,0         | 9,0   |
|                    | Living                   | Observed frequency        | 1        | 2          | 5           | 8     |
|                    |                          | Expected frequency        | ,9       | 1,7        | 5,3         | 8,0   |
|                    | Total                    | Observed frequency        | 8        | 15         | 46          | 69    |
|                    |                          | Expected frequency        | 8,0      | 15,0       | 46,0        | 69,0  |

**Table S12: Relationship between KIM-1 on day 3 after transplant (KIM-1 D3) and cold ischemia time of graft.** Contingency table performed by Pearson's  $\chi^2$  test. Missing: missing values. > 70 Perc: patients above the 70th percentile. < 70 Perc: patients below the 70th percentile.

|                         |                |                           | KIM-1 D3 |         |             |       |
|-------------------------|----------------|---------------------------|----------|---------|-------------|-------|
|                         |                |                           | Missing  | >70Perc | <70Perc     | Total |
| Cold ischemia (minutes) | <120           | Observed frequency        | 1        | 2       | 8           | 11    |
|                         |                | Expected frequency        | 1,3      | 2,4     | 7,3         | 11,0  |
|                         | <b>120-900</b> | <b>Observed frequency</b> | 6        | 2       | <b>8</b>    | 16    |
|                         |                | <b>Expected frequency</b> | 1,9      | 3,5     | <b>10,7</b> | 16,0  |
|                         | 900-1440       | Observed frequency        | 1        | 11      | 30          | 42    |
|                         |                | Expected frequency        | 4,9      | 9,1     | 28,0        | 42,0  |
|                         | Total          | Observed frequency        | 8        | 15      | 46          | 69    |
|                         |                | Expected frequency        | 8,0      | 15,0    | 46,0        | 69,0  |

**Table S13: Relationship between highest value of KIM-1 in the first week after transplant (KIM-1 W1) and stabilization time of renal function (based on plasma creatinine)..** Contingency table performed by Pearson's  $\chi^2$  test. Missing: missing values. > 70 Perc: patients above the 70th percentile. < 70 Perc: patients below the 70th percentile.

|                           |              |                           | KIM-1 S1 |            |         |       |
|---------------------------|--------------|---------------------------|----------|------------|---------|-------|
|                           |              |                           | Missing  | >70Perc    | <70Perc | Total |
| Stabilization time (days) | 0-30         | Observed frequency        | 1        | 0          | 1       | 2     |
|                           |              | Expected frequency        | ,0       | ,4         | 1,6     | 2,0   |
|                           | <b>30-60</b> | <b>Observed frequency</b> | 0        | <b>11</b>  | 36      | 47    |
|                           |              | <b>Expected frequency</b> | ,7       | <b>9,5</b> | 36,8    | 47,0  |
|                           | 60-90        | Observed frequency        | 0        | 3          | 15      | 18    |
|                           |              | Expected frequency        | ,3       | 3,7        | 14,1    | 18,0  |
|                           | 90-120       | Observed frequency        | 0        | 0          | 2       | 2     |
|                           |              | Expected frequency        | ,0       | ,4         | 1,6     | 2,0   |
|                           | Total        | Observed frequency        | 1        | 14         | 54      | 69    |
|                           |              | Expected frequency        | 1,0      | 14,0       | 54,0    | 69,0  |
